# Supplementary material
Source: MDPI journal article supplement (https://www.mdpi.com/2311-7524/9/12/1335)
Supplement: s1 [file s1 › Supplementary Tables.xlsx]

## Sheet: Table S1
Supplementary Table S1 Transcriptome data and quality assessment.
Sample	Raw reads	Raw bases(bp)	Clean Reads Pairs	Clean base(bp)	Length	Q20(%)	Q30(%)	GC(%)	Total mapped ratio
B11	57059528	8558929200	27827963	8348388900	150;150	98.76;98.17	95.37;93.33	45.44;45.44	0.9637
B12	146348106	21952215900	64817800	19445340000	150;150	98.49;97.80	95.03;92.63	46.91;46.88	0.9759
B13	69342328	10401349200	34065688	10219706400	150;150	98.90;98.19	95.84;93.39	45.00;44.99	0.9791
B14	68436816	10265522400	33542153	10062645900	150;150	98.71;98.00	95.14;92.72	45.64;45.65	0.9769
B15	66840482	10026072300	32761841	9828552300	150;150	98.76;98.06	95.35;92.94	45.88;45.88	0.9766
B16	71279744	10691961600	34961095	10488328500	150;150	98.66;98.22	95.01;93.46	46.12;46.12	0.9769
B17	74625350	11193802500	36572358	10971707400	150;150	98.76;97.99	95.32;92.65	45.53;45.54	0.9772
B21	54322194	8148329100	26668814	8000644200	150;150	98.69;97.97	95.05;92.59	45.43;45.45	0.9396
B22	72372832	10855924800	35007920	10502376000	150;150	98.77;97.97	95.36;92.64	45.39;45.39	0.9775
B23	70937852	10640677800	34577501	10373250300	150;150	98.77;97.99	95.37;92.68	45.50;45.49	0.9785
B24	53776128	8066419200	26298282	7889484600	150;150	98.78;98.07	95.40;92.91	45.49;45.48	0.9791
B25	50388914	7558337100	24699847	7409954100	150;150	98.70;97.89	95.09;92.29	45.85;45.81	0.9766
B26	72528976	10879346400	35689412	10706823600	150;150	98.86;98.02	95.65;92.76	45.51;45.52	0.9781
B27	77601210	11640181500	38162221	11448666300	150;150	98.75;98.07	95.28;92.95	45.75;45.77	0.9789
B31	69793062	10468959300	34505245	10351573500	150;150	98.76;97.79	95.28;91.96	45.11;45.13	0.9806
B32	54154822	8123223300	26693607	8008082100	150;150	98.69;98.02	95.07;92.76	45.97;45.96	0.9816
B33	77329276	11599391400	38076664	11422999200	150;150	98.82;98.11	95.52;93.07	45.06;45.06	0.9797
B34	63383456	9507518400	31109888	9332966400	150;150	98.68;97.79	95.02;91.90	45.45;45.44	0.978
B35	50237104	7535565600	24622641	7386792300	150;150	98.77;98.11	95.38;93.13	45.59;45.61	0.9768
B36	67443150	10116472500	32734198	9820259400	150;150	98.77;97.88	95.35;92.31	45.38;45.38	0.9754
B37	58582598	8787389700	28805805	8641741500	150;150	98.66;97.86	94.94;92.15	45.84;45.82	0.9764
S41	77157804	11573670600	37879224	11363767200	150;150	98.82;98.24	95.56;93.56	45.28;45.30	0.9774
S42	66959404	10043910600	32760745	9828223500	150;150	98.82;97.32	95.45;90.34	45.94;45.91	0.9803
S43	68624938	10293740700	33515502	10054650600	150;150	98.83;98.14	95.59;93.19	45.42;45.42	0.9785
S44	65404282	9810642300	32090866	9627259800	150;150	98.80;98.05	95.46;92.91	45.66;45.67	0.9768
S45	75150078	11272511700	36912871	11073861300	150;150	98.67;97.92	95.00;92.36	46.09;46.06	0.978
S46	64042410	9606361500	31346947	9404084100	150;150	98.74;98.08	95.24;92.98	45.50;45.50	0.977
S47	71295962	10694394300	34585976	10375792800	150;150	98.74;98.20	95.27;93.42	45.57;45.57	0.9765
S51	61731208	9259681200	30157737	9047321100	150;150	98.82;98.05	95.51;92.83	45.21;45.20	0.9411
S52	70443508	10566526200	34530750	10359225000	150;150	98.75;97.94	95.29;92.47	45.91;45.91	0.981
S53	77029894	11554484100	37530992	11259297600	150;150	98.65;97.82	94.93;92.04	45.50;45.50	0.9788
S54	65239264	9785889600	31897396	9569218800	150;150	98.75;97.96	95.28;92.57	45.45;45.45	0.9791
S55	64130266	9619539900	31374451	9412335300	150;150	98.70;97.89	95.08;92.32	45.75;45.77	0.9773
S56	78816644	11822496600	38653189	11595956700	150;150	98.68;97.97	95.02;92.56	45.68;45.67	0.9777
S57	72238196	10835729400	39481132	11844339600	150;150	98.13;97.37	94.11;91.60	46.76;46.74	0.9642
S61	70464522	10569678300	35443236	10632970800	150;150	98.77;98.03	95.33;92.78	45.11;45.12	0.9769
S62	71474754	10721213100	34531882	10359564600	150;150	98.81;98.06	95.51;92.90	46.09;46.08	0.9805
S63	59983086	8997462900	35008232	10502469600	150;150	98.78;98.19	95.41;93.38	45.52;45.52	0.9779
S64	72621770	10893265500	29359737	8807921100	150;150	98.78;98.12	95.39;93.13	45.58;45.57	0.978
S65	59260840	8889126000	35324261	10597278300	150;150	98.79;97.91	95.42;92.47	46.12;46.12	0.9746
S66	66843720	10026558000	28804625	8641387500	150;150	98.86;97.97	95.65;92.62	45.69;45.69	0.9759
S67	81661916	12249287400	32405058	9721517400	150;150	98.80;98.15	95.47;93.22	45.90;45.91	0.9775
Tatal	2907358394	436103759100	1415795752	424738725600	/	/	/	/	/

## Sheet: Table S2
Supplementary Table S2 The number of genes in each module was identified by WGCNA method.
ModuleColors	Number
green	820
tan	323
turquoise	4036
salmon	316
lightcyan	143
brown	865
blue	958
pink	478
yellow	838
black	667
midnightblue	178
cyan	304
grey	115
red	814
magenta	475
purple	419
greenyellow	327
Total	12076

## Sheet: Table S3
Supplementary Table S3 Gene sets enriched in phenotype( the big and small fruit type) by GSEA methord.
Name	Size	ES	NES	Nom p-val	FDR q-val	Fwer p-val	Rank at max	Leading edge
Ko04136 autophagy other	38	0.541508	2.04681	0	0.00730047	0.009	5509	tags=63%, list=23%, signal=82%
Ko04016 mapk signaling pathway plant	165	0.394401	1.91435	0	0.0152132	0.037	4661	tags=31%, list=19%, signal=38%
Ko00941 flavonoid biosynthesis	58	0.452155	1.79543	0	0.0218268	0.124	5507	tags=47%, list=23%, signal=60%
Ko04626 plant-pathogen interaction	334	0.321964	1.67143	0	0.0313347	0.275	6122	tags=34%, list=25%, signal=45%
Ko00940 phenylpropanoid biosynthesis	200	0.331602	1.61607	0	0.0430868	0.404	4638	tags=31%, list=19%, signal=38%
Ko04075 plant hormone signal transduction	268	0.289046	1.48211	0.00257069	0.0981446	0.755	4897	tags=29%, list=20%, signal=36%
Ko00902 monoterpenoid biosynthesis	24	0.578643	1.88416	0.00448431	0.0137827	0.05	5319	tags=58%, list=22%, signal=75%
Ko02010 abc transporters	41	0.456891	1.72644	0.00448431	0.0280084	0.207	5763	tags=41%, list=24%, signal=54%
Ko00908 zeatin biosynthesis	20	0.570226	1.78038	0.00650759	0.0210746	0.143	1681	tags=40%, list=7%, signal=43%
Ko00410 beta-alanine metabolism	48	0.451239	1.70759	0.00881057	0.0277505	0.228	5265	tags=46%, list=22%, signal=58%
Ko00071 fatty acid degradation	50	0.397252	1.52357	0.0119332	0.0797773	0.649	2805	tags=28%, list=12%, signal=32%
Ko00565 ether lipid metabolism	24	0.542456	1.81398	0.013986	0.0228869	0.105	3792	tags=33%, list=16%, signal=40%
Ko00945 stilbenoid, diarylheptanoid and gingerol biosynthesis	38	0.400674	1.45101	0.047836	0.112527	0.823	5507	tags=37%, list=23%, signal=48%
Ko00073 cutin, suberine and wax biosynthesis	30	0.411171	1.43121	0.0516129	0.119341	0.856	5045	tags=43%, list=21%, signal=55%
Ko00280 valine, leucine and isoleucine degradation	51	0.336853	1.31616	0.0647321	0.21634	0.989	3727	tags=31%, list=15%, signal=37%
Ko00562 inositol phosphate metabolism	67	0.312114	1.28537	0.1	0.230001	0.997	5634	tags=40%, list=23%, signal=52%
Ko04070 phosphatidylinositol signaling system	71	0.30575	1.26408	0.107623	0.234148	1	5634	tags=34%, list=23%, signal=44%
Ko00650 butanoate metabolism	22	0.413763	1.30628	0.108407	0.215965	0.991	2659	tags=32%, list=11%, signal=36%
Ko00591 linoleic acid metabolism	16	0.457015	1.35162	0.111588	0.187823	0.968	4285	tags=38%, list=18%, signal=46%
Ko04712 circadian rhythm - plant	42	0.337875	1.26891	0.128505	0.239239	0.999	2822	tags=21%, list=12%, signal=24%
Ko04120 ubiquitin mediated proteolysis	139	0.247366	1.16109	0.158151	0.326449	1	5573	tags=30%, list=23%, signal=39%
Ko00909 sesquiterpenoid and triterpenoid biosynthesis	48	0.307946	1.17794	0.164706	0.310018	1	5787	tags=38%, list=24%, signal=49%
Ko01040 biosynthesis of unsaturated fatty acids	20	0.399459	1.24391	0.177528	0.248873	1	7137	tags=50%, list=30%, signal=71%
Ko00904 diterpenoid biosynthesis	35	0.33193	1.19235	0.184757	0.311958	1	6573	tags=43%, list=27%, signal=59%
Ko00600 sphingolipid metabolism	25	0.360508	1.18032	0.217002	0.318677	1	4266	tags=20%, list=18%, signal=24%
Ko04144 endocytosis	160	0.231487	1.10792	0.217391	0.395256	1	4149	tags=21%, list=17%, signal=25%
Ko00040 pentose and glucuronate interconversions	145	0.233344	1.10228	0.235443	0.391416	1	8324	tags=50%, list=34%, signal=75%
Ko00100 steroid biosynthesis	33	0.309045	1.12021	0.26969	0.386883	1	5148	tags=36%, list=21%, signal=46%
Ko00520 amino sugar and nucleotide sugar metabolism	126	0.234516	1.07546	0.292683	0.430923	1	6436	tags=36%, list=27%, signal=48%
Ko00561 glycerolipid metabolism	75	0.256686	1.06755	0.331765	0.432017	1	3288	tags=21%, list=14%, signal=25%
Ko00592 alpha-linolenic acid metabolism	59	0.255914	1.03811	0.390411	0.476861	1	4633	tags=24%, list=19%, signal=29%
Ko00564 glycerophospholipid metabolism	98	0.235301	1.03793	0.391403	0.462512	1	4641	tags=24%, list=19%, signal=30%
Ko00380 tryptophan metabolism	71	0.232216	0.956504	0.533333	0.627301	1	3961	tags=20%, list=16%, signal=24%
Ko00920 sulfur metabolism	31	0.258273	0.89148	0.602837	0.762959	1	3896	tags=32%, list=16%, signal=38%
Ko00052 galactose metabolism	49	0.21864	0.852657	0.688636	0.825202	1	2555	tags=16%, list=11%, signal=18%
Ko00062 fatty acid elongation	31	0.244407	0.833749	0.727273	0.817247	1	4545	tags=23%, list=19%, signal=28%
Ko00310 lysine degradation	32	0.238398	0.835757	0.753555	0.836122	1	2878	tags=19%, list=12%, signal=21%
Ko00760 nicotinate and nicotinamide metabolism	22	0.209682	0.682682	0.91342	0.977136	1	7306	tags=41%, list=30%, signal=59%
Ko00450 selenocompound metabolism	17	0.152858	0.452539	0.995506	0.999355	1	3061	tags=12%, list=13%, signal=13%
Ko03010 ribosome	286	-0.70391	-3.46109	0	0	0	4194	tags=77%, list=17%, signal=92%
Ko03008 ribosome biogenesis in eukaryotes	98	-0.595545	-2.55131	0	0	0	4856	tags=56%, list=20%, signal=70%
Ko00195 photosynthesis	42	-0.665714	-2.413	0	0	0	3656	tags=62%, list=15%, signal=73%
Ko03018 rna degradation	100	-0.508264	-2.18649	0	0	0	5047	tags=42%, list=21%, signal=53%
Ko03020 rna polymerase	40	-0.597902	-2.16822	0	0	0	3971	tags=48%, list=16%, signal=57%
Ko00196 photosynthesis - antenna proteins	18	-0.706029	-2.07285	0	0.000195402	0.001	5386	tags=83%, list=22%, signal=107%
Ko00970 aminoacyl-trna biosynthesis	66	-0.501403	-2.01437	0	0.00114418	0.007	5583	tags=48%, list=23%, signal=63%
Ko03050 proteasome	59	-0.506489	-1.97528	0	0.001921	0.014	5781	tags=46%, list=24%, signal=60%
Ko00710 carbon fixation in photosynthetic organisms	64	-0.495074	-1.95263	0	0.00200381	0.018	5977	tags=48%, list=25%, signal=64%
Ko03013 nucleocytoplasmic transport	117	-0.440915	-1.92767	0	0.00250895	0.025	7842	tags=53%, list=32%, signal=78%
Ko00670 one carbon pool by folate	19	-0.633741	-1.89521	0	0.00351147	0.038	4029	tags=58%, list=17%, signal=69%
Ko00860 porphyrin and chlorophyll metabolism	47	-0.509226	-1.88898	0	0.00366622	0.043	4472	tags=51%, list=19%, signal=63%
Ko00190 oxidative phosphorylation	105	-0.435999	-1.87691	0	0.00419679	0.053	7073	tags=49%, list=29%, signal=68%
Ko03440 homologous recombination	59	-0.462941	-1.79708	0	0.00679141	0.101	9096	tags=71%, list=38%, signal=114%
Ko00010 glycolysis / gluconeogenesis	121	-0.348413	-1.54417	0	0.0416903	0.667	6794	tags=45%, list=28%, signal=63%
Ko00400 phenylalanine, tyrosine and tryptophan biosynthesis	44	-0.459401	-1.68819	0.00174216	0.0160108	0.268	3349	tags=32%, list=14%, signal=37%
Ko03030 dna replication	56	-0.453321	-1.77214	0.00183486	0.00860488	0.131	8936	tags=66%, list=37%, signal=105%
Ko00510 n-glycan biosynthesis	46	-0.504849	-1.84251	0.00184502	0.005043	0.068	5588	tags=50%, list=23%, signal=65%
Ko00230 purine metabolism	79	-0.415238	-1.69241	0.00334448	0.0161027	0.256	7504	tags=53%, list=31%, signal=77%
Ko03060 protein export	50	-0.472101	-1.76896	0.0034188	0.00850256	0.137	6533	tags=54%, list=27%, signal=74%
Ko00780 biotin metabolism	20	-0.635343	-1.95554	0.00355872	0.00222646	0.018	4286	tags=55%, list=18%, signal=67%
Ko00563 glycosylphosphatidylinositol (gpi)-anchor biosynthesis	29	-0.548061	-1.82731	0.00363636	0.00543541	0.078	8808	tags=79%, list=36%, signal=125%
Ko00630 glyoxylate and dicarboxylate metabolism	72	-0.385457	-1.55125	0.00511073	0.0410353	0.649	4402	tags=36%, list=18%, signal=44%
Ko00260 glycine, serine and threonine metabolism	77	-0.378588	-1.56267	0.00672269	0.0399177	0.619	4218	tags=35%, list=17%, signal=42%
Ko03430 mismatch repair	45	-0.449503	-1.65564	0.00690846	0.0202547	0.349	8796	tags=67%, list=36%, signal=105%
Ko00220 arginine biosynthesis	31	-0.477773	-1.63266	0.00739372	0.024352	0.412	6920	tags=58%, list=29%, signal=81%
Ko00290 valine, leucine and isoleucine biosynthesis	19	-0.558952	-1.66043	0.010453	0.0201497	0.336	4076	tags=47%, list=17%, signal=57%
Ko00513 various types of n-glycan biosynthesis	34	-0.46223	-1.58808	0.0105079	0.0329098	0.527	6518	tags=50%, list=27%, signal=68%
Ko00240 pyrimidine metabolism	60	-0.399108	-1.56241	0.0140351	0.0385607	0.62	6198	tags=48%, list=26%, signal=65%
Ko00020 citrate cycle (tca cycle)	46	-0.399019	-1.49236	0.0212389	0.0596009	0.8	5667	tags=37%, list=23%, signal=48%
Ko03410 base excision repair	47	-0.376306	-1.40709	0.0585106	0.108828	0.961	8492	tags=57%, list=35%, signal=88%
Ko00030 pentose phosphate pathway	46	-0.365504	-1.37447	0.0721831	0.130909	0.984	5042	tags=41%, list=21%, signal=52%
Ko00250 alanine, aspartate and glutamate metabolism	47	-0.357785	-1.31618	0.0814159	0.183777	0.995	5760	tags=47%, list=24%, signal=61%
Ko03420 nucleotide excision repair	68	-0.315533	-1.26178	0.117438	0.232236	0.999	6477	tags=43%, list=27%, signal=58%
Ko00740 riboflavin metabolism	20	-0.425899	-1.30788	0.12523	0.188458	0.996	1811	tags=30%, list=7%, signal=32%
Ko03040 spliceosome	219	-0.243524	-1.16925	0.128617	0.316158	1	6614	tags=32%, list=27%, signal=44%
Ko00480 glutathione metabolism	114	-0.276407	-1.21959	0.138354	0.280523	1	7877	tags=40%, list=33%, signal=60%
Ko00300 lysine biosynthesis	17	-0.449119	-1.3073	0.142349	0.183735	0.996	3616	tags=47%, list=15%, signal=55%
Ko00340 histidine metabolism	17	-0.443114	-1.29566	0.153846	0.192844	0.998	3898	tags=47%, list=16%, signal=56%
Ko00061 fatty acid biosynthesis	53	-0.330317	-1.25256	0.157221	0.239147	1	5144	tags=34%, list=21%, signal=43%
Ko00620 pyruvate metabolism	102	-0.279522	-1.19578	0.165794	0.295797	1	6813	tags=40%, list=28%, signal=56%
Ko00900 terpenoid backbone biosynthesis	50	-0.32675	-1.21429	0.17029	0.281603	1	2062	tags=18%, list=9%, signal=20%
Ko00906 carotenoid biosynthesis	40	-0.338424	-1.19286	0.203704	0.293039	1	6178	tags=45%, list=26%, signal=60%
Ko00790 folate biosynthesis	24	-0.384806	-1.20935	0.206204	0.282472	1	4033	tags=33%, list=17%, signal=40%
Ko00960 tropane, piperidine and pyridine alkaloid biosynthesis	26	-0.363059	-1.17381	0.229508	0.315847	1	7305	tags=46%, list=30%, signal=66%
Ko00130 ubiquinone and other terpenoid-quinone biosynthesis	44	-0.306383	-1.12339	0.273535	0.379054	1	7147	tags=45%, list=30%, signal=64%
Ko00730 thiamine metabolism	22	-0.363988	-1.13025	0.290844	0.375306	1	2577	tags=27%, list=11%, signal=31%
Ko03015 mrna surveillance pathway	112	-0.249925	-1.07818	0.297203	0.459532	1	8622	tags=45%, list=36%, signal=69%
Ko00460 cyanoamino acid metabolism	97	-0.252061	-1.06337	0.318258	0.471414	1	4943	tags=23%, list=20%, signal=28%
Ko00270 cysteine and methionine metabolism	109	-0.241664	-1.04917	0.363339	0.491296	1	5861	tags=33%, list=24%, signal=43%
Ko00360 phenylalanine metabolism	38	-0.303003	-1.06874	0.36413	0.469722	1	1563	tags=18%, list=6%, signal=20%
Ko00051 fructose and mannose metabolism	56	-0.261205	-1.01337	0.435593	0.561021	1	8374	tags=48%, list=35%, signal=74%
Ko04130 snare interactions in vesicular transport	44	-0.252303	-0.932637	0.579044	0.729224	1	6617	tags=32%, list=27%, signal=44%
Ko00500 starch and sucrose metabolism	154	-0.206082	-0.947291	0.59699	0.705876	1	6404	tags=29%, list=27%, signal=40%
Ko00350 tyrosine metabolism	53	-0.242429	-0.913876	0.614726	0.747355	1	3349	tags=21%, list=14%, signal=24%
Ko00531 glycosaminoglycan degradation	16	-0.301865	-0.865729	0.655955	0.833607	1	5961	tags=31%, list=25%, signal=41%
Ko04141 protein processing in endoplasmic reticulum	233	-0.191323	-0.920262	0.680713	0.74537	1	6561	tags=26%, list=27%, signal=36%
Ko00910 nitrogen metabolism	33	-0.24964	-0.85144	0.683363	0.848979	1	837	tags=12%, list=3%, signal=13%
Ko04146 peroxisome	85	-0.21624	-0.893935	0.705373	0.782258	1	3978	tags=21%, list=16%, signal=25%
Ko00950 isoquinoline alkaloid biosynthesis	30	-0.244348	-0.818244	0.743197	0.869708	1	3349	tags=20%, list=14%, signal=23%
Ko00590 arachidonic acid metabolism	17	-0.274683	-0.796195	0.749533	0.893356	1	6142	tags=35%, list=25%, signal=47%
Ko00053 ascorbate and aldarate metabolism	61	-0.211572	-0.828715	0.759425	0.865484	1	5461	tags=25%, list=23%, signal=32%
Ko00770 pantothenate and coa biosynthesis	36	-0.240196	-0.830297	0.763303	0.876897	1	4076	tags=22%, list=17%, signal=27%
Ko00330 arginine and proline metabolism	50	-0.206525	-0.767783	0.852632	0.92057	1	5779	tags=26%, list=24%, signal=34%
Ko03022 basal transcription factors	47	-0.196194	-0.723857	0.895105	0.942301	1	6071	tags=32%, list=25%, signal=43%
Ko00640 propanoate metabolism	41	-0.203596	-0.737945	0.90161	0.942479	1	5088	tags=24%, list=21%, signal=31%
Ko04145 phagosome	76	-0.172265	-0.705799	0.961538	0.944074	1	7296	tags=29%, list=30%, signal=41%
Ko00511 other glycan degradation	17	-0.202315	-0.575183	0.963461	0.988592	1	9022	tags=47%, list=37%, signal=75%

## Sheet: Table S4
Supplementary Table S4 Functional annotation of 54 genes.
NO.	Gene ID	Gene function annotations
1	Prupe.5G096900	Tyrosine--tRNA ligase 1, cytoplasmic
2	Prupe.1G500800	Aminoacylase-1
3	Prupe.8G181800	Aminoacylase-1
4	Prupe.7G175400	Phospholipase D delta
5	Prupe.1G554400	UDP-glycosyltransferase 88F5
6	Prupe.1G580500	Cytochrome P450 98A2
7	Prupe.8G128100	Caffeoyl-CoA O-methyltransferase
8	Prupe.7G264000	Glycerate dehydrogenase
9	Prupe.7G260700	NADP-dependent glyceraldehyde-3-phosphate dehydrogenase
10	Prupe.1G505300	Probable calcium-binding protein CML29
11	Prupe.1G521800	Serine/threonine-protein kinase SAPK2
12	Prupe.2G195300	Transcription factor bHLH14
13	Prupe.1G521600	Serine/threonine-protein kinase SAPK1
14	Prupe.5G138300	Respiratory burst oxidase homolog protein C
15	Prupe.3G272500	Plasma membrane ATPase 2 (Fragment)
16	Prupe.4G020800	ATP synthase gamma chain, chloroplastic
17	Prupe.4G264000	Dihydropyrimidinase
18	Prupe.7G067100	Peroxisomal acyl-coenzyme A oxidase 1
19	Prupe.6G166100	Bifunctional 3-dehydroquinate dehydratase/shikimate dehydrogenase, chloroplastic
20	Prupe.7G171600	3-dehydroquinate synthase, chloroplastic
21	Prupe.2G260800	Peroxidase 4
22	Prupe.3G097700	Cinnamoyl-CoA reductase 1
23	Prupe.6G044900	Cationic peroxidase 1
24	Prupe.4G186300	Peroxidase 47
25	Prupe.7G079100	Peroxidase 53
26	Prupe.5G230400	Beta-glucosidase 44
27	Prupe.6G156600	Beta-glucosidase 11
28	Prupe.3G107300	4-coumarate--CoA ligase 1
29	Prupe.1G013900	Ferredoxin C 1, chloroplastic
30	Prupe.3G233900	Indole-3-acetic acid-amido synthetase GH3.10
31	Prupe.8G079200	SAUR-like auxin-responsive protein family, Indole-3-acetic acid-induced protein ARG7
32	Prupe.8G082100	Auxin-responsive protein SAUR50
33	Prupe.7G236100	DELLA protein GAI
34	Prupe.1G221300	Auxin-responsive protein SAUR32
35	Prupe.8G082200	Auxin-responsive protein SAUR71
36	Prupe.7G234800	Auxin-responsive protein IAA17
37	Prupe.4G064700	Shaggy-related protein kinase eta
38	Prupe.2G222600	Cyclic nucleotide-gated ion channel 1
39	Prupe.7G168400	Calcium-dependent protein kinase 28
40	Prupe.5G181000	Protein EDS1L
41	Prupe.4G092600	Cyclic nucleotide-gated ion channel 1
42	Prupe.5G184800	Calcium-dependent protein kinase 10
43	Prupe.2G223700	Cyclic nucleotide-gated ion channel 1
44	Prupe.6G143100	Cyclic nucleotide-gated ion channel 1
45	Prupe.2G223500	Cyclic nucleotide-gated ion channel 1
46	Prupe.2G155900	Receptor-like protein EIX2
47	Prupe.4G045000	Allantoinase
48	Prupe.5G074000	Adenine phosphoribosyltransferase 3
49	Prupe.5G199700	dCTP pyrophosphatase 1
50	Prupe.2G091600	Malate dehydrogenase [NADP], chloroplastic
51	Prupe.7G221100	NADP-dependent malic enzyme
52	Prupe.2G319700	Caffeic acid 3-O-methyltransferase
53	Prupe.4G091300	Probable 3-hydroxyisobutyrate dehydrogenase, mitochondrial
54	Prupe.3G176900	3-hydroxyisobutyryl-CoA hydrolase-like protein 5

## Sheet: Table S5
Supplementary Table S5 Primers for RT-qPCR.
Gene ID	common name	Forward sequence(5'- 3')	Reverse sequence(5'- 3')
PpActin	‘--	GATTCCGGTGCCCAGAAGT	CCAGCAGCTTCCATTCCAA
Prupe.1G221300	PpSAUR32	ATGATGAAGGAAAAGGGTAAGAAGG	CGGGCAGGACCTGCTCTT
Prupe.1G521600	PpSAPK1	ATGGAGAGGTATGAGATTATGAAAGATATT	CTTGTGGCCTCTCTCAATGAACT
Prupe.1G521800	PpSAPK2	GTCCTGCTGACACCAACTCATCT	CTCATCCTCACTAAATCTACCAGCA
Prupe.2G195300	PpbHLH14	TCGAACGACCACCAGGACAA	GGATTTTCCTTCTTTCTGAAAGAATC
Prupe.3G233900	PpGH3.10	CATACCACTCCATAGACATAAGCAAGA	CAGTGAAAGTAGTGAGGACTATCTCATATT
Prupe.4G064700	PpSRPK	TGGTGAGACTGTGGCTATAAAGAAG	GTTGTGGAAAAGAAACAATGCTTC
Prupe.7G234800	PpIAA17	GGCAAGAGTAGTTGGGTGGCC	TTAAGCAATATTATGCTCACCGCT
Prupe.7G236100	PpGAI	ATCGGTAAGGTCGCTGGTTACTT	AAGGGCAGGCCTCGTAGAAG
Prupe.8G079200	PpSAUR	GCTACTTTGCAGTCTATGTTGGGG	GCACCCATTGGATGATCATATCC
Prupe.8G082100	PpSAUR50	CATCCTCAGTTCCAGTGCCTCC	TCATCTGAGCATTGAAGTTAGGGA
Prupe.8G082200	PpSAUR71	TCGCGGCAGCACGTGCAC	CGGCTTGTACTAGAAGCTTCTGG
